# Supplementary material for: Simultaneous resection of synchronous colorectal liver metastasis: Feasibility and development of a prediction model
Source: PubMed Central journal article supplement — Ann Hepatobiliary Pancreat Surg. 2022 Sep 28;27(1):40–8. doi: 10.14701/ahbps.22-043 (PMC9947373; doi:10.14701/ahbps.22-043), 2022-09-28
Supplement: ahbps-27-1-40-supple.pdf [file ahbps-27-1-40-supple.pdf]

**Supplementary Table 1.** Multivariate Cox regression analysis for overall, disease-free and liver recurrence-free survivals

| Variable                              | Hazard ratio | 95% confidence interval | p-value |
|---------------------------------------|--------------|-------------------------|---------|
| <b>Overall survival</b>               |              |                         |         |
| Location of primary                   |              |                         |         |
| Right                                 | 2.151        | 0.875–5.288             | 0.095   |
| Left                                  | 0.471        | 0.164–1.353             | 0.162   |
| Rectum                                | Reference    |                         |         |
| Clinical T stage                      |              |                         |         |
| T2                                    | Reference    |                         |         |
| T3                                    | 1.990        | 0.422–9.387             | 0.384   |
| T4                                    | 7.308        | 1.264–42.444            | 0.026   |
| Signet Histology                      | 3.914        | 1.068–14.346            | 0.039   |
| CEA > 200 ng/mL                       | 11.903       | 3.416–41.474            | 0.000   |
| <b>Disease-free survival</b>          |              |                         |         |
| Location of the primary               |              |                         |         |
| Right                                 | 1.648        | 0.943–2.881             | 0.079   |
| Left                                  | 1.180        | 0.697–2                 | 0.537   |
| Rectum                                | Reference    |                         |         |
| Clinical T stage                      |              |                         |         |
| T2                                    | Reference    |                         |         |
| T3                                    | 1.069        | 0.504–2.27              | 0.861   |
| T4                                    | 2.764        | 1.104–6.921             | 0.029   |
| Size of largest metastasis > 5 cm     | 2.235        | 1.215–4.109             | 0.009   |
| pN stage                              |              |                         |         |
| N0                                    | Reference    |                         |         |
| N1                                    | 2.023        | 1.199–3.415             | 0.008   |
| N2                                    | 1.977        | 1.059–3.693             | 0.032   |
| <b>Liver recurrence-free survival</b> |              |                         |         |
| Location of the primary               |              |                         |         |
| Right                                 | 1.289        | 0.562–2.955             | 0.552   |
| Left                                  | 0.414        | 0.149–1.152             | 0.091   |
| Rectum                                | Reference    |                         |         |
| CEA > 200ng/ml                        | 5.174        | 1.665–16.074            | 0.004   |
| pN stage                              |              |                         |         |
| N0                                    | Reference    |                         |         |
| N1                                    | 2.368        | 1.098–5.108             | 0.027   |
| N2                                    | 2.718        | 0.498–10.638            | 0.284   |
| Comorbidity                           | 1.920        | 0.947–3.895             | 0.070   |

Variables entered: age, sex, body mass index, hemoglobin, albumin, comorbidities, clinical T stage, paN stage, histologic subtype, neoadjuvant chemotherapy, location of primary tumour, distribution, number, size of liver metastasis, extrahepatic disease, CEA levels, and KRAS mutation. CEA, carcinoembryonic antigen; pN stage, pathological N stage.

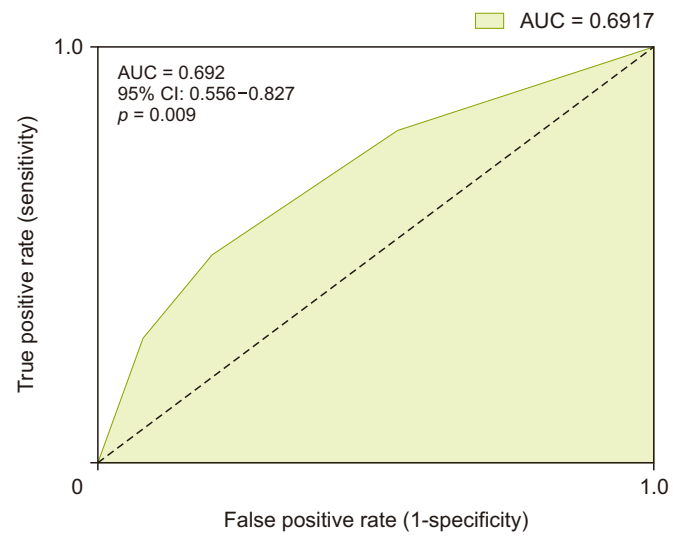

**Supplementary Fig. 1.** Receiver operating characteristic curve for the prediction model. AUC, area under the ROC curve; CI, confidence interval.
